# Supplementary material for: Venom Proteome of the Box Jellyfish Chironex fleckeri
Source: PubMed Central journal article supplement (PMC3517583; doi:10.1371/journal.pone.0047866), 2012-12-07

20137964

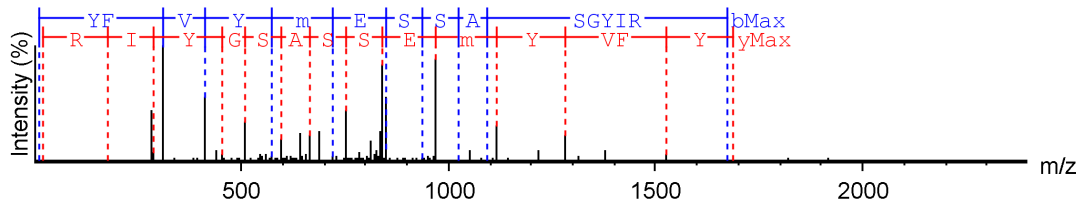

| #  | b       | b-H2O   | b-NH3   | b (2+) | Seq       | y       | y-H2O   | y-NH3   | y (2+) | #  |
|----|---------|---------|---------|--------|-----------|---------|---------|---------|--------|----|
| 1  | 164.07  | 146.06  | 147.04  | 82.54  | Y         |         |         |         |        | 14 |
| 2  | 311.12  | 293.13  | 294.11  | 156.07 | F         | 1525.66 | 1507.69 | 1508.67 | 763.35 | 13 |
| 3  | 410.19  | 392.20  | 393.18  | 205.60 | V         | 1378.63 | 1360.62 | 1361.60 | 689.82 | 12 |
| 4  | 573.23  | 555.26  | 556.23  | 287.14 | Y         | 1279.56 | 1261.46 | 1262.54 | 640.28 | 11 |
| 5  | 720.28  | 702.30  | 703.31  | 360.65 | M(+15.99) | 1116.48 | 1098.49 | 1099.47 | 558.75 | 10 |
| 6  | 849.33  | 831.32  | 832.32  | 425.17 | E         | 969.45  | 951.39  | 952.44  | 485.23 | 9  |
| 7  | 936.40  | 918.37  | 919.35  | 468.69 | S         | 840.38  | 822.41  | 823.37  | 420.71 | 8  |
| 8  | 1023.47 | 1005.40 | 1006.39 | 512.21 | S         | 753.36  | 735.38  | 736.36  | 377.19 | 7  |
| 9  | 1094.44 | 1076.44 | 1077.42 | 547.73 | A         | 666.33  | 648.29  | 649.33  | 333.68 | 6  |
| 10 | 1181.48 | 1163.47 | 1164.46 | 591.24 | S         | 595.30  | 577.31  | 578.29  | 298.16 | 5  |
| 11 | 1238.50 | 1220.49 | 1221.48 | 619.75 | G         | 508.27  | 490.28  | 491.27  | 254.64 | 4  |
| 12 | 1401.57 | 1383.56 | 1384.54 | 701.28 | Y         | 451.26  | 433.26  | 434.24  | 226.13 | 3  |
| 13 | 1514.65 | 1496.64 | 1497.62 | 757.83 | I         | 288.19  | 270.19  | 271.16  | 144.60 | 2  |
| 14 |         |         |         |        | R         | 175.12  | 157.11  | 158.09  | 88.06  | 1  |

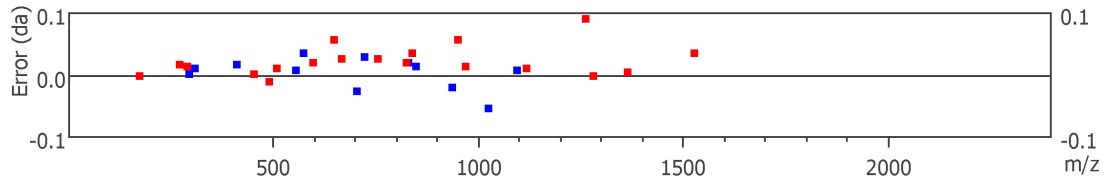

20137965

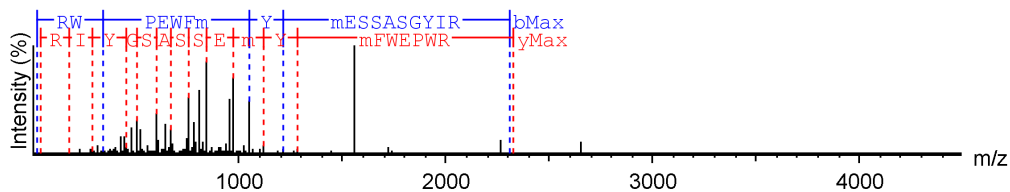

| #  | b       | b-H2O   | b-NH3   | b (2+)  | Seq       | y       | y-H2O   | y-NH3   | y (2+)  | #  |
|----|---------|---------|---------|---------|-----------|---------|---------|---------|---------|----|
| 1  | 157.11  | 139.10  | 140.08  | 79.05   | R         |         |         |         |         | 18 |
| 2  | 343.16  | 325.18  | 326.16  | 172.09  | W         | 2171.92 | 2153.91 | 2154.89 | 1086.46 | 17 |
| 3  | 440.24  | 422.23  | 423.18  | 220.62  | P         | 1985.84 | 1967.83 | 1968.81 | 993.42  | 16 |
| 4  | 569.28  | 551.27  | 552.26  | 285.14  | E         | 1888.79 | 1870.78 | 1871.76 | 944.89  | 15 |
| 5  | 755.36  | 737.35  | 738.34  | 378.18  | W         | 1759.75 | 1741.73 | 1742.72 | 880.37  | 14 |
| 6  | 902.43  | 884.42  | 885.40  | 451.72  | F         | 1573.67 | 1555.66 | 1556.64 | 787.33  | 13 |
| 7  | 1049.52 | 1031.46 | 1032.44 | 525.26  | M(+15.99) | 1426.60 | 1408.59 | 1409.57 | 713.80  | 12 |
| 8  | 1212.54 | 1194.52 | 1195.52 | 606.78  | Y         | 1279.66 | 1261.55 | 1262.54 | 640.28  | 11 |
| 9  | 1359.57 | 1341.53 | 1342.54 | 680.29  | M(+15.99) | 1116.47 | 1098.47 | 1099.47 | 558.73  | 10 |
| 10 | 1488.61 | 1470.60 | 1471.58 | 744.80  | E         | 969.44  | 951.45  | 952.44  | 485.23  | 9  |
| 11 | 1575.64 | 1557.63 | 1558.61 | 788.33  | S         | 840.40  | 822.38  | 823.39  | 420.71  | 8  |
| 12 | 1662.67 | 1644.66 | 1645.65 | 831.84  | S         | 753.37  | 735.38  | 736.33  | 377.19  | 7  |
| 13 | 1733.71 | 1715.70 | 1716.68 | 867.35  | A         | 666.34  | 648.35  | 649.26  | 333.68  | 6  |
| 14 | 1820.74 | 1802.73 | 1803.71 | 910.87  | S         | 595.30  | 577.31  | 578.28  | 298.14  | 5  |
| 15 | 1877.76 | 1859.75 | 1860.74 | 939.45  | G         | 508.27  | 490.28  | 491.26  | 254.64  | 4  |
| 16 | 2040.83 | 2022.82 | 2023.80 | 1020.91 | Y         | 451.26  | 433.26  | 434.20  | 226.13  | 3  |
| 17 | 2153.91 | 2135.90 | 2136.88 | 1077.46 | I         | 288.19  | 270.19  | 271.17  | 144.60  | 2  |
| 18 |         |         |         |         | R         | 175.11  | 157.11  | 158.09  | 88.06   | 1  |

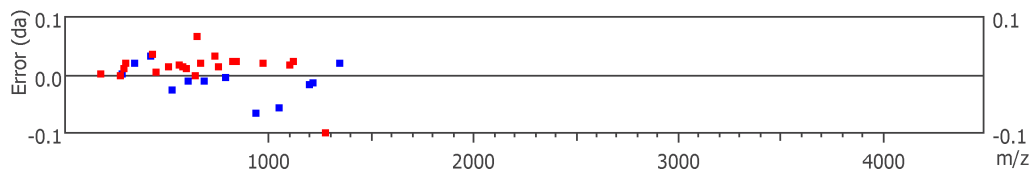

260066272

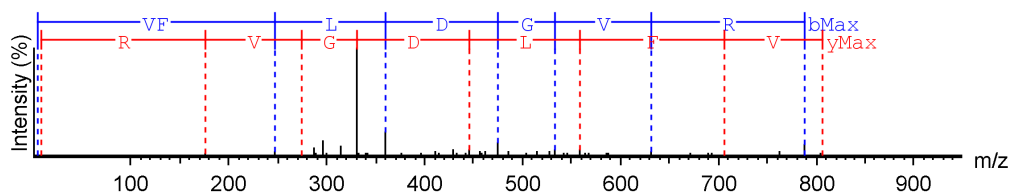

| # | b      | b-H2O  | b-NH3  | b (2+) | Seq | y      | y-H2O  | y-NH3  | y (2+) | # |
|---|--------|--------|--------|--------|-----|--------|--------|--------|--------|---|
| 1 | 100.08 | 82.07  | 83.05  | 50.54  | V   |        |        |        |        | 7 |
| 2 | 247.11 | 229.13 | 230.12 | 124.07 | F   | 706.36 | 688.38 | 689.33 | 353.69 | 6 |
| 3 | 360.19 | 342.17 | 343.20 | 180.61 | L   | 559.30 | 541.31 | 542.26 | 280.16 | 5 |
| 4 | 475.21 | 457.22 | 458.17 | 238.13 | D   | 446.25 | 428.23 | 429.22 | 223.62 | 4 |
| 5 | 532.21 | 514.24 | 515.25 | 266.64 | G   | 331.20 | 313.20 | 314.19 | 166.10 | 3 |
| 6 | 631.37 | 613.33 | 614.36 | 316.17 | V   | 274.16 | 256.18 | 257.15 | 137.59 | 2 |
| 7 |        |        |        |        | R   | 175.12 | 157.11 | 158.10 | 88.06  | 1 |

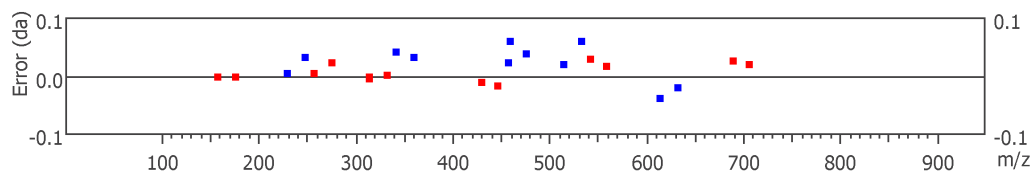

156388143

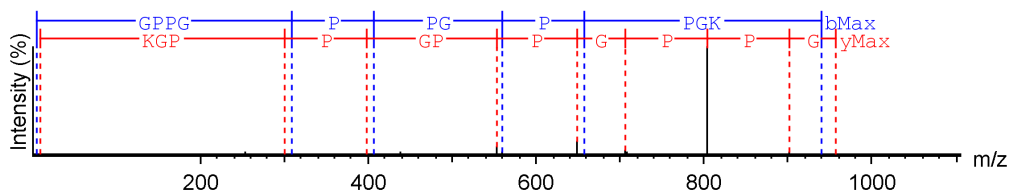

| #  | b      | b-H2O  | b-NH3  | b (2+) | Seq | y      | y-H2O  | y-NH3  | y (2+) | #  |
|----|--------|--------|--------|--------|-----|--------|--------|--------|--------|----|
| 1  | 58.03  | 40.02  | 41.00  | 29.51  | G   |        |        |        |        | 11 |
| 2  | 155.08 | 137.07 | 138.06 | 78.04  | P   | 900.54 | 882.48 | 883.47 | 450.75 | 10 |
| 3  | 252.13 | 234.12 | 235.11 | 126.57 | P   | 803.44 | 785.41 | 786.41 | 402.22 | 9  |
| 4  | 309.15 | 291.15 | 292.13 | 155.08 | G   | 706.39 | 688.38 | 689.36 | 353.69 | 8  |
| 5  | 406.22 | 388.20 | 389.18 | 203.60 | P   | 649.36 | 631.36 | 632.34 | 325.18 | 7  |
| 6  | 503.26 | 485.25 | 486.23 | 252.13 | P   | 552.28 | 534.30 | 535.29 | 276.66 | 6  |
| 7  | 560.23 | 542.27 | 543.26 | 280.64 | G   | 455.26 | 437.20 | 438.23 | 228.13 | 5  |
| 8  | 657.33 | 639.26 | 640.31 | 329.17 | P   | 398.20 | 380.23 | 381.21 | 199.62 | 4  |
| 9  | 754.39 | 736.38 | 737.36 | 377.69 | P   | 301.19 | 283.18 | 284.16 | 151.09 | 3  |
| 10 | 811.41 | 793.40 | 794.38 | 406.21 | G   | 204.13 | 186.12 | 187.11 | 102.57 | 2  |
| 11 |        |        |        |        | K   | 147.11 | 129.10 | 130.09 | 74.06  | 1  |

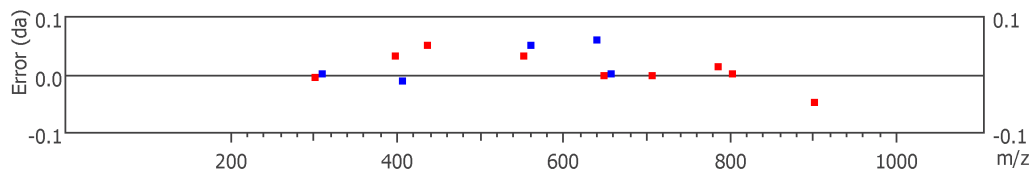

221121786

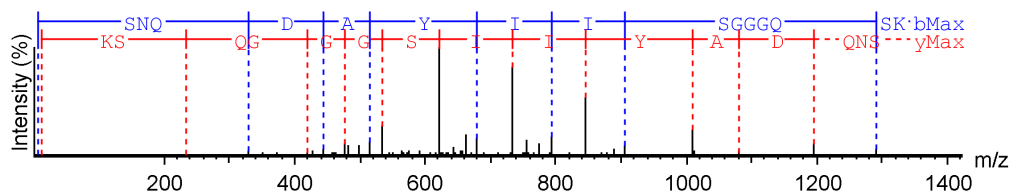

| #  | b       | b-H2O   | b-NH3   | b (2+) | Seq | y       | y-H2O   | y-NH3   | y (2+) | #  |
|----|---------|---------|---------|--------|-----|---------|---------|---------|--------|----|
| 1  | 88.04   | 70.03   | 71.01   | 44.52  | S   |         |         |         |        | 15 |
| 2  | 202.08  | 184.07  | 185.06  | 101.54 | N   | 1437.70 | 1419.69 | 1420.67 | 719.35 | 14 |
| 3  | 330.12  | 312.14  | 313.11  | 165.57 | Q   | 1323.65 | 1305.64 | 1306.63 | 662.33 | 13 |
| 4  | 445.12  | 427.13  | 428.14  | 223.08 | D   | 1195.55 | 1177.58 | 1178.57 | 598.30 | 12 |
| 5  | 516.19  | 498.16  | 499.14  | 258.60 | A   | 1080.59 | 1062.56 | 1063.54 | 540.78 | 11 |
| 6  | 679.27  | 661.26  | 662.24  | 340.13 | Y   | 1009.47 | 991.52  | 992.50  | 505.27 | 10 |
| 7  | 792.36  | 774.29  | 775.34  | 396.68 | I   | 846.46  | 828.46  | 829.39  | 423.73 | 9  |
| 8  | 905.44  | 887.43  | 888.48  | 453.22 | I   | 733.35  | 715.38  | 716.36  | 367.19 | 8  |
| 9  | 992.47  | 974.46  | 975.44  | 496.73 | S   | 620.27  | 602.29  | 603.27  | 310.65 | 7  |
| 10 | 1049.49 | 1031.48 | 1032.46 | 525.25 | G   | 533.23  | 515.26  | 516.19  | 267.13 | 6  |
| 11 | 1106.51 | 1088.50 | 1089.48 | 553.76 | G   | 476.21  | 458.24  | 459.22  | 238.62 | 5  |
| 12 | 1163.53 | 1145.52 | 1146.51 | 582.27 | G   | 419.23  | 401.21  | 402.20  | 210.11 | 4  |
| 13 | 1291.50 | 1273.58 | 1274.56 | 646.30 | Q   | 362.20  | 344.21  | 345.19  | 181.60 | 3  |
| 14 | 1378.62 | 1360.61 | 1361.60 | 689.81 | S   | 234.14  | 216.13  | 217.12  | 117.57 | 2  |
| 15 |         |         |         |        | K   | 147.11  | 129.10  | 130.09  | 74.06  | 1  |

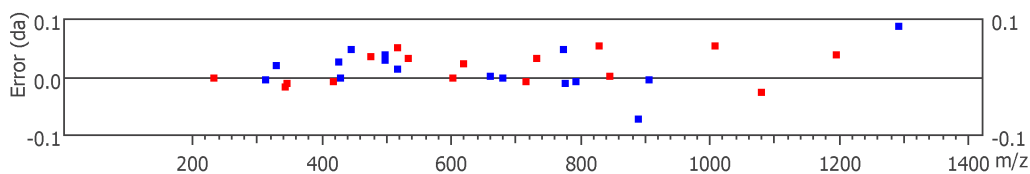

156226146

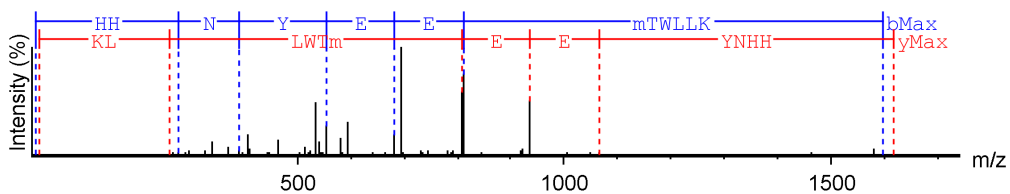

| #  | b       | b-H2O   | b-NH3   | b (2+) | Seq       | y       | y-H2O   | y-NH3   | y (2+) | #  |
|----|---------|---------|---------|--------|-----------|---------|---------|---------|--------|----|
| 1  | 138.07  | 120.06  | 121.04  | 69.53  | H         |         |         |         |        | 12 |
| 2  | 275.11  | 257.12  | 258.10  | 138.06 | H         | 1479.69 | 1461.68 | 1462.67 | 740.32 | 11 |
| 3  | 389.16  | 371.14  | 372.14  | 195.08 | N         | 1342.63 | 1324.62 | 1325.61 | 671.82 | 10 |
| 4  | 552.20  | 534.22  | 535.20  | 276.62 | Y         | 1228.59 | 1210.58 | 1211.56 | 614.80 | 9  |
| 5  | 681.25  | 663.26  | 664.25  | 341.13 | E         | 1065.46 | 1047.46 | 1048.50 | 533.26 | 8  |
| 6  | 810.30  | 792.32  | 793.29  | 405.66 | E         | 936.53  | 918.57  | 919.46  | 468.75 | 7  |
| 7  | 957.35  | 939.34  | 940.33  | 479.18 | M(+15.99) | 807.46  | 789.47  | 790.42  | 404.22 | 6  |
| 8  | 1058.40 | 1040.39 | 1041.37 | 529.70 | T         | 660.41  | 642.40  | 643.36  | 330.70 | 5  |
| 9  | 1244.48 | 1226.47 | 1227.45 | 622.74 | W         | 559.36  | 541.28  | 542.33  | 280.18 | 4  |
| 10 | 1357.56 | 1339.55 | 1340.54 | 679.29 | L         | 373.28  | 355.27  | 356.25  | 187.09 | 3  |
| 11 | 1470.65 | 1452.64 | 1453.62 | 735.78 | L         | 260.20  | 242.19  | 243.12  | 130.60 | 2  |
| 12 |         |         |         |        | K         | 147.11  | 129.10  | 130.09  | 74.06  | 1  |

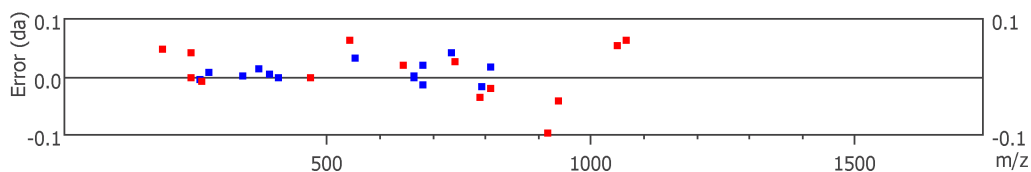

221112215

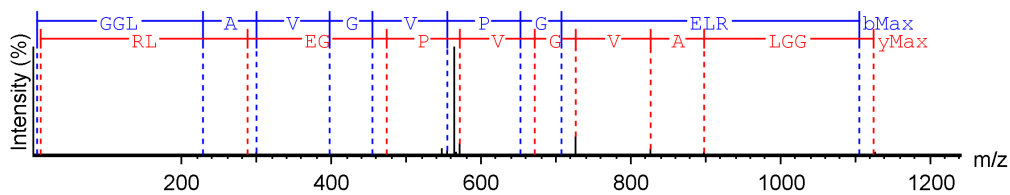

| #  | b      | b-H2O  | b-NH3  | b (2+) | Seq | y       | y-H2O   | y-NH3   | y (2+) | #  |
|----|--------|--------|--------|--------|-----|---------|---------|---------|--------|----|
| 1  | 58.03  | 40.02  | 41.00  | 29.51  | G   |         |         |         |        | 12 |
| 2  | 115.05 | 97.04  | 98.02  | 58.03  | G   | 1067.62 | 1049.61 | 1050.59 | 534.31 | 11 |
| 3  | 228.14 | 210.12 | 211.11 | 114.57 | L   | 1010.60 | 992.59  | 993.57  | 505.80 | 10 |
| 4  | 299.15 | 281.16 | 282.17 | 150.09 | A   | 897.52  | 879.50  | 880.49  | 449.26 | 9  |
| 5  | 398.22 | 380.23 | 381.21 | 199.62 | V   | 826.45  | 808.47  | 809.48  | 413.74 | 8  |
| 6  | 455.24 | 437.26 | 438.23 | 228.13 | G   | 727.39  | 709.40  | 710.38  | 364.20 | 7  |
| 7  | 554.29 | 536.36 | 537.29 | 277.67 | V   | 670.35  | 652.38  | 653.36  | 335.69 | 6  |
| 8  | 651.40 | 633.43 | 634.36 | 326.19 | P   | 571.30  | 553.28  | 554.29  | 286.16 | 5  |
| 9  | 708.32 | 690.37 | 691.38 | 354.70 | G   | 474.23  | 456.26  | 457.24  | 237.63 | 4  |
| 10 | 837.45 | 819.44 | 820.42 | 419.22 | E   | 417.25  | 399.24  | 400.22  | 209.12 | 3  |
| 11 | 950.53 | 932.52 | 933.50 | 475.77 | L   | 288.18  | 270.19  | 271.18  | 144.60 | 2  |
| 12 |        |        |        |        | R   | 175.12  | 157.11  | 158.09  | 88.06  | 1  |

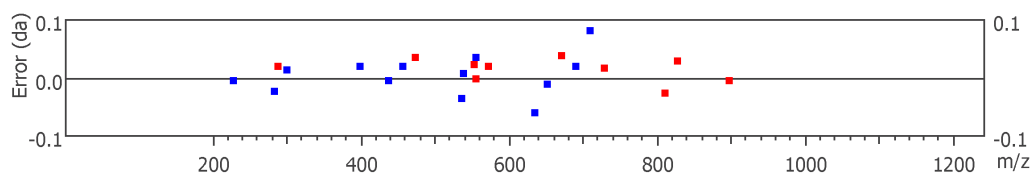

219231428

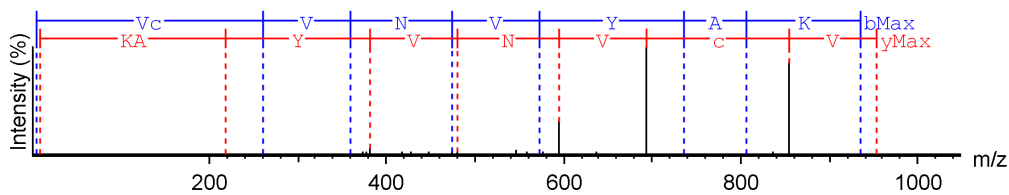

| # | b      | b-H2O  | b-NH3  | b (2+) | Seq       | y      | y-H2O  | y-NH3  | y (2+) | # |
|---|--------|--------|--------|--------|-----------|--------|--------|--------|--------|---|
| 1 | 100.08 | 82.07  | 83.05  | 50.54  | V         |        |        |        |        | 8 |
| 2 | 260.09 | 242.10 | 243.10 | 130.55 | C(+57.02) | 853.41 | 835.32 | 836.41 | 427.21 | 7 |
| 3 | 359.16 | 341.17 | 342.15 | 180.09 | V         | 693.38 | 675.38 | 676.29 | 347.20 | 6 |
| 4 | 473.23 | 455.21 | 456.14 | 237.11 | N         | 594.31 | 576.31 | 577.28 | 297.66 | 5 |
| 5 | 572.25 | 554.28 | 555.26 | 286.64 | V         | 480.27 | 462.27 | 463.25 | 240.64 | 4 |
| 6 | 735.29 | 717.34 | 718.32 | 368.17 | Y         | 381.20 | 363.21 | 364.19 | 191.11 | 3 |
| 7 | 806.40 | 788.38 | 789.42 | 403.69 | A         | 218.16 | 200.14 | 201.12 | 109.57 | 2 |
| 8 |        |        |        |        | K         | 147.11 | 129.10 | 130.09 | 74.06  | 1 |

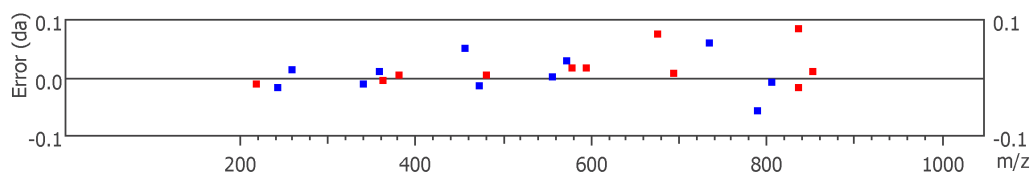



223649562

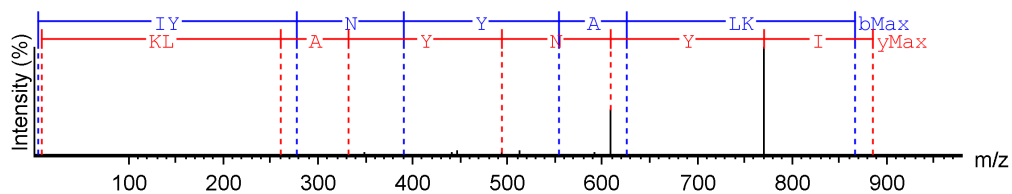

| # | b      | b-H2O  | b-NH3  | b (2+) | Seq | y      | y-H2O  | y-NH3  | y (2+) | # |
|---|--------|--------|--------|--------|-----|--------|--------|--------|--------|---|
| 1 | 114.09 | 96.08  | 97.06  | 57.55  | I   |        |        |        |        | 7 |
| 2 | 277.14 | 259.14 | 260.18 | 139.08 | Y   | 771.39 | 753.39 | 754.37 | 386.20 | 6 |
| 3 | 391.20 | 373.19 | 374.17 | 196.10 | N   | 608.32 | 590.30 | 591.29 | 304.67 | 5 |
| 4 | 554.21 | 536.25 | 537.23 | 277.63 | Y   | 494.31 | 476.29 | 477.27 | 247.65 | 4 |
| 5 | 625.28 | 607.30 | 608.32 | 313.15 | A   | 331.23 | 313.22 | 314.21 | 166.12 | 3 |
| 6 | 738.38 | 720.37 | 721.36 | 369.69 | L   | 260.18 | 242.19 | 243.17 | 130.60 | 2 |
| 7 |        |        |        |        | K   | 147.11 | 129.10 | 130.09 | 74.06  | 1 |

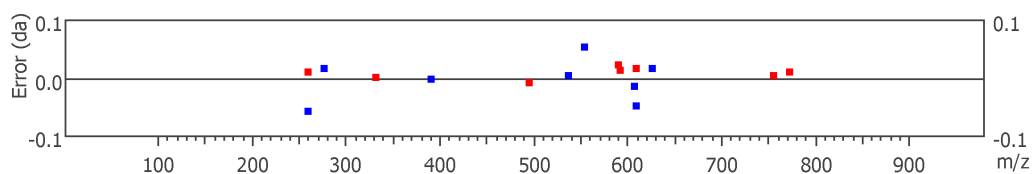

Supplement: pone.0047866.s006.pdf [file pone.0047866.s006.pdf]
