# Supplementary material for: Venom Proteome of the Box Jellyfish Chironex fleckeri
Source: PLoS One. 2012 Dec 7;7(12):e47866. doi: 10.1371/journal.pone.0047866 (PMC3517583; doi:10.1371/journal.pone.0047866)
Supplement: Information S3 — Proteins identified during homology searches. Proteins identified using a homology search of de novo sequence tags in PEAKS. Abbreviations used: ID — identification number corresponding to custom database supplied as S5; −10lgP — PEAKS probability score; CO — percent cover; SC — total number of significant spectra contributing to the identification; USC — number of unique and significant spectra contributing to the identification. A ‘+’ in the SignalP column denotes the presence of a predicted signal sequence using SignalP and a ‘+’ in the Hydra column denotes the identification of a similar protein in the H. magnipapillata venom proteome. (XLSX) [file pone.0047866.s003.xlsx]

## Sheet: Sheet2
Proteins identified using a homology search of de novo sequence tags in PEAKS. Abbreviations used: ID --- identification number corresponding to custom database supplied as S5; -10lgP --- PEAKS probability score; CO --- percent cover; SC --- total number of significant spectra contributing to the identification; USC --- number of unique and significant spectra contributing to the identification. …
Accession	-10lgP	CO	SC	USC	Description	SignalP	Hydra
Toxins
152211366	362.78	54	45	23	Toxin CfTX-1 [Chironex fleckeri]	+	+
152211368	332.93	67	34	26	Toxin CfTX-2 [Chironex fleckeri]	+	+
20137750	273.72	32	23	2	Toxin CqTX-A	+	+
20137964	45.69	3	1	1	Toxin CaTX-A [Carybdea alata]	+	+
20137965	56.47	4	1	1	Toxin CrTX-A [Carybdea rastonii]	+	+
260066272	46.78	2	1	1	Cytotoxin A isoform 1 [Malo kingi]	-	+
Nematogalectins
306408168	93.89	13	2	1	Nematogalectin B [Hydra magnipapillata]	+	+
308210736	148.78	17	5	3	Nematogalectin-related [Aurelia aurita]	+	+
215260535	142.72	16	4	1	Nematogalectin [Acropora millepora]	+	+
Structural
221107145	90.25	10	2	2	Collagen alpha-1(XII) chain [Hydra magnipapillata]	+	+
221118656	201.61	3	10	10	DNA-directed RNA polymerase II [Hydra magnipapillata]	+	+
221129496	120.92	1	2	2	DNA-directed RNA polymerase_ omega subunit	-	+
156401103	72.46	8	2	2	ADP,ATP carrier protein-like [Nematostella vectensis]	-
221129327	210.24	45	16	5	Beta-tubulin [Hydra magnipapillata]	-	+
89138372	184.33	48	10	1	Beta-tubulin [Acropora millepora]	-	+
728793	208.32	32	12	1	Actin	-	+
162122963	108.89	22	3	1	Actin [Nematostella vectensis]	-	+
294372631	158.11	25	4	1	Non-muscle actin [Clytia hemisphaerica]	-	+
156198376	137.98	36	7	1	Histone cluster 1, H2ag-like	-	+
156219637	126.82	30	6	1	Histone cluster 1, H2bl-like	-	+
221107857	98.76	23	4	3	Histone H2B-1 [Hydra magnipapillata]	-	+
156219675	92.33	18	4	2	Histone H3.2-like	-	+
163678147	62.91	15	2	1	Histone 2, H2	-	+
221130531	124.69	2	3	3	Clathrin heavy chain 1	-	-
156388143	61.02	3	1	1	Collagen alpha-2(IX) chain [Nematostella vectensis]	-	+
221121786	54.27	0	1	1	Procollagen_ type XIV_ alpha 1 [Hydra magnipapillata]	-	+
Dickkopf
221115495	226.04	47	11	8	Dickkopf protein 3	+	+
156408614	118.65	30	6	2	Dickkopf-3 related protein [Nematostella vectensis]	-	+
221111230	221.68	42	13	5	Dickkopf-3 related protein [Hydra magnipapillata]	+	+
Proteases
221128287	102.93	3	2	1	Neprilysin [Hydra magnipapillata]	-	+
156400736	54.28	8	2	2	Carboxypeptidase [Nematostella vectensis]	-	+
156226146	39.08	3	1	1	Carboxypeptidase D [Nematostella vectensis]	-	+
221111504	79.61	18	2	1	Endothelin-converting enzyme 2	+	+
Heat shock proteins
221132017	100.34	6	3	3	Heat shock protein	+	-
Oxido-reductive
162106843	103.04	13	3	3	ATP synthase subunit alpha	-	+
82862750	52.02	20	2	1	V-type proton ATPase	-	+
Miscellaneous
221119922	67.96	2	2	2	Gamma-glutamyltranspeptidase 1 [Hydra magnipapillata]	+	+
221112215	59.92	2	1	1	Gamma-glutamyl transferase 1a [Hydra magnipapillata]	-	+
221116631	119.78	1	3	3	Viral A-type inclusion protein	-	-
239736186	64.17	5	2	2	Elongation factor-1 alpha [Chironex fleckeri]	-	-
219231428	53.83	6	1	1	Tyrosine kinase receptor [Anemonia viridis]	-	-
223649562	34.95	5	1	1	Nematoblast-specific protein nb012a [Hydra oligactis]	+	-
Unknown
221113955	162.89	23	5	5	Hypothetical protein [Hydra magnipapillata]	+	-
221123368	143.5	3	4	4	Hypothetical protein [Hydra magnipapillata]	+	-
221116853	116.69	3	2	1	Predicted protein [Hydra magnipapillata]	+	-
50698431	60.51	17	1	1	Hypothetical protein [Hydractinia echinata]	-	-
